# Supplementary material for: Investigations on the Effects of Different Calcium Supply Exceeding the Requirements on Mineral Serum Concentrations and Bone Metabolism in Young Warmblood Stallions
Source: MDPI journal article supplement (doi:10.3390/ani11082439), 2021-08-19
Supplement: s1 [file s1]

## Supplementary Materials

**Table S1.** Initial and final Bodyweight (BW) as well as initial age of the stallions.

| Horse ID       | BW (kg) week 0 | BW (kg) week 20 | Age (d) week 0 |
|----------------|----------------|-----------------|----------------|
| <b>Group 1</b> |                |                 |                |
| 1              | 470            | 500             | 943            |
| 2              | 560            | 560             | 941            |
| 3              | 580            | 590             | 979            |
| 4              | 570            | 580             | 988            |
| 5              | 500            | 540             | 954            |
| 6              | 550            | 580             | 924            |
| 7              | 480            | 500             | 956            |
| 8              | 530            | 540             | 970            |
| 9              | 540            | 550             | 976            |
| 10             | 540            | 560             | 993            |
| 11             | 550            | 570             | 960            |
| 12             | 530            | 540             | 971            |
| 13             | 530            | 550             | 953            |
| 14             | 530            | 550             | 969            |
| 31 *           | 500            |                 |                |
| 32 **          | 530            |                 |                |
| <b>Group 2</b> |                |                 |                |
| 15             | 560            | 580             | 941            |
| 16             | 490            | 520             | 932            |
| 17             | 530            | 540             | 951            |
| 18             | 560            | 580             | 967            |
| 19             | 530            | 540             | 941            |
| 20             | 550            | 570             | 979            |
| 21             | 530            | 530             | 976            |
| 22             | 540            | 550             | 946            |
| 23             | 560            | 570             | 998            |
| 24             | 510            | 520             | 998            |
| 25             | 550            | 570             | 931            |
| 26             | 610            | 580             | 1000           |
| 27             | 480            | 530             | 990            |
| 28             | 500            | 550             | 1011           |
| 29             | 570            | 570             | 908            |
| 30             | 540            | 550             | 958            |

\* Died as a result of colic. \*\* Sold.

**Table S2.** Chemical composition of the concentrates, oats, soybean meal (SBM) and straw.

| Item             | Unit                 | Concentrates | Oats   | SBM   | Straw<br>phase 1 | Straw<br>phase 2 |
|------------------|----------------------|--------------|--------|-------|------------------|------------------|
| Crude ash        | g/kg DM <sup>1</sup> | 79.9         | 875    | 71.6  | 76.1             | 41.5             |
| Crude protein    | g/kg DM              | 131          | 21.6   | 517   | 51.0             | 32.3             |
| Ether extract    | g/kg DM              | 24.8         | 115    | 19.3  | 5.86             | 8.28             |
| Crude fibre      | g/kg DM              | 127          | 46.9   | 67.0  | 449              | 493              |
| NDF <sup>2</sup> | g/kg DM              | 344          | 104    | 23.9  | 830              | 731              |
| Calcium          | g/kg DM              | 14.7         | 372    | 3.75  | 2.22             | 2.42             |
| Phosphorus       | g/kg DM              | 4.53         | 0.993  | 7.05  | 1.92             | 1.48             |
| Magnesium        | g/kg DM              | 1.85         | 3.72   | 3.30  | 0.454            | 0.399            |
| Sodium           | g/kg DM              | 2.20         | 1.20   | 0.34  | 0.0436           | 0.0827           |
| Potassium        | g/kg DM              | 12.6         | 0.0299 | 24.0  | 10.1             | 14.4             |
| Chloride         | g/kg DM              | 4.37         | 0.809  | 1.02  | 4.11             | 2.02             |
| Iron             | mg/kg DM             | 409          | 92.9   | 307   | 69.8             | 52.2             |
| Copper           | mg/kg DM             | 19.1         | 3.75   | 20.5  | 1.61             | 2.57             |
| Zinc             | mg/kg DM             | 131          | 35.6   | 54.5  | 6.02             | 17.9             |
| Manganese        | mg/kg DM             | 108          | 42.7   | 42.0  | 9.36             | 18.9             |
| Selenium         | mg/kg DM             | 0.435        | 0.010  | 0.239 | 0.033            | 0.010            |

<sup>1</sup> DM, dry matter. <sup>2</sup> NDF, neutral detergent fibre.

**Table S3.** Chemical composition of the hay used in phase 1 and phase 2.

| Item             | Unit                 | Phase 1 | Phase 2 |
|------------------|----------------------|---------|---------|
| Crude ash        | g/kg DM <sup>1</sup> | 55.5    | 51.4    |
| Crude protein    | g/kg DM              | 86.4    | 82.5    |
| Ether extract    | g/kg DM              | 13.1    | 14.6    |
| Crude fibre      | g/kg DM              | 322     | 329     |
| NDF <sup>2</sup> | g/kg DM              | 705     | 707     |
| Calcium          | g/kg DM              | 3.43    | 3.52    |
| Phosphorus       | g/kg DM              | 2.41    | 2.70    |
| Magnesium        | g/kg DM              | 1.57    | 1.68    |
| Sodium           | g/kg DM              | 1.43    | 0.845   |
| Potassium        | g/kg DM              | 11.9    | 14.8    |
| Chloride         | g/kg DM              | 8.24    | 8.75    |
| Sulphur          | g/kg DM              | 1.91    | 1.65    |
| Iron             | mg/kg DM             | 244     | 121     |
| Copper           | mg/kg DM             | 3.02    | 3.51    |
| Zinc             | mg/kg DM             | 29.4    | 30.6    |
| Manganese        | mg/kg DM             | 193     | 167     |
| Selenium         | mg/kg DM             | 0.014   | 0.012   |

<sup>1</sup> DM, dry matter. <sup>2</sup> NDF, neutral detergent fibre.

**Table S4.** Requirements of 600 kg warmblood horses<sup>1</sup> in the age of 25 to 36 months and supply of minerals from 8 kg hay as fed in phase 1 and phase 2.

| Mineral | Unit | Requirement | Hay phase 1 | Hay phase 2 |
|---------|------|-------------|-------------|-------------|
| Ca      | g/d  | 25.8        | 24.2        | 25.1        |
| P       | g/d  | 16.6        | 17.0        | 19.3        |
| Mg      | g/d  | 6.50        | 11.1        | 12.0        |
| Na      | g/d  | 3.40        | 10.1        | 6.02        |
| K       | g/d  | 16.8        | 83.9        | 106         |
| Cl      | g/d  | 2.0         | 58.1        | 62.4        |
| Fe      | mg/d | 520         | 1722        | 863         |
| Zn      | mg/d | 525         | 208         | 218         |
| Cu      | mg/d | 130         | 21.3        | 25.0        |
| Mn      | mg/d | 525         | 1363        | 1191        |
| Se      | mg/d | 1.75        | 0.099       | 0.086       |

<sup>1</sup> Requirement according to GfE 2014 [1].

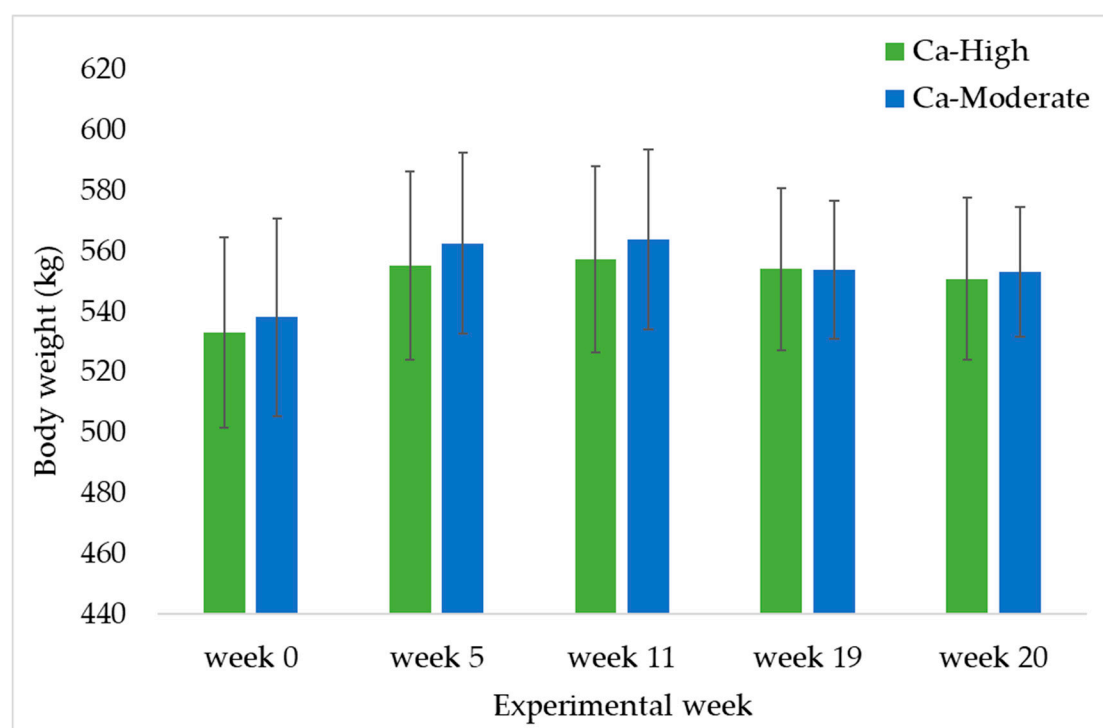

**Figure S1.** Body weight development of Ca-High (n = 14) and Ca-Moderate (n = 16) during the experimental period.

**Table S5.** Concentrations of trace elements in the serum samples of the stallions (mean  $\pm$  SD, min – max,  $\mu\text{g/dl}$ ).

| Week |            | Fe        |             | Cu         |             | Zn         |             | Se         |             |
|------|------------|-----------|-------------|------------|-------------|------------|-------------|------------|-------------|
|      |            | Ca-High   | Ca-Moderate | Ca-High    | Ca-Moderate | Ca-High    | Ca-Moderate | Ca-High    | Ca-Moderate |
| 0    | Mean $\pm$ | 175 $\pm$ | 208 $\pm$   | 123 $\pm$  | 126 $\pm$   | 48.4 $\pm$ | 56.1 $\pm$  | 11.6 $\pm$ | 12.9 $\pm$  |
|      | SD         | 42.1      | 31.7        | 11.7       | 20.2        | 7.79       | 8.81        | 1.80       | 2.82        |
|      | min - max  | 117-252   | 152-271     | 107-142    | 101-177     | 32.7-61.4  | 43.1-76.4   | 7.96-14.1  | 8.84-18.6   |
| 4    | Mean $\pm$ | 173 $\pm$ | 178 $\pm$   | 104 $\pm$  | 105 $\pm$   | 43 $\pm$   | 40.5 $\pm$  | 12.0 $\pm$ | 13.3 $\pm$  |
|      | SD         | 18.5      | 36.0        | 27.2       | 17.3        | 3.43       | 4.84        | 2.48       | 3.68        |
|      | min - max  | 152-207   | 116-240     | 15-125     | 72.4-133    | 36.9-46.9  | 33.7-51.4   | 5.69-16.4  | 7.35-20.6   |
| 10   | Mean $\pm$ | 151 $\pm$ | 163 $\pm$   | 96.1 $\pm$ | 90.8 $\pm$  | 41.4 $\pm$ | 45.3 $\pm$  | 15.2 $\pm$ | 12.3 $\pm$  |
|      | SD         | 17.4      | 23.3        | 8.40       | 10.6        | 4.37       | 6.49        | 3.79       | 2.28        |
|      | min - max  | 123-182   | 136-217     | 82.1-110   | 76.4-107    | 34.3-48.4  | 35.4-56.9   | 9.46-21.4  | 8.59-17.9   |
| 14   | Mean $\pm$ | 169 $\pm$ | 211 $\pm$   | 105 $\pm$  | 101 $\pm$   | 43.8 $\pm$ | 38.8 $\pm$  | 15.3 $\pm$ | 13.1 $\pm$  |
|      | SD         | 50.7      | 40.9        | 13.8       | 27.1        | 4.90       | 5.05        | 3.20       | 3.60        |
|      | min - max  | 18.0-226  | 136-280     | 85.1-134   | 19.2-135    | 35.7-51.9  | 27-45.7     | 10.9-21.2  | 6.39-19.8   |
| 18   | Mean $\pm$ | 151 $\pm$ | 184 $\pm$   | 96.2 $\pm$ | 84.9 $\pm$  | 45.7 $\pm$ | 43.8 $\pm$  | 12.5 $\pm$ | 14.9 $\pm$  |
|      | SD         | 19.0      | 28.6        | 12.3       | 16.5        | 4.10       | 5.78        | 1.54       | 1.83        |
|      | min - max  | 125-193   | 146-232     | 71.3-110   | 59.6-108    | 39.1-53.3  | 32.0-56.9   | 10.3-15.4  | 11.3-17.6   |
| 20   | Mean $\pm$ | 170 $\pm$ | 166 $\pm$   | 88.7 $\pm$ | 91.5 $\pm$  | 42.3 $\pm$ | 47.9 $\pm$  | 15.1 $\pm$ | 17.7 $\pm$  |
|      | SD         | 25.3      | 25.9        | 10.2       | 15.6        | 4.14       | 8.30        | 2.35       | 2.13        |
|      | min - max  | 134-213   | 123-206     | 69.6-105   | 63.4-116    | 36.0-48.6  | 19.9-56.6   | 11.6-20.3  | 13.7-20.7   |
